# Supplementary material
Source: MDPI journal article supplement (https://www.mdpi.com/2073-4433/13/10/1613)
Supplement: s1 [file s1]

## Supplementary material:

# Scenario Analysis of Air Quality Improvement in Warsaw, Poland, by the End of the Current Decade

Piotr Holnicki <sup>1,\*</sup>, Andrzej Kałuszko <sup>1</sup> and Zbigniew Nahorski <sup>1,2</sup>

<sup>1</sup> Systems Research Institute, Polish Academy of Sciences, 01-447 Warsaw, Poland;  
kaluszko@ibspan.waw.pl (A.K.); nahorski@ibspan.waw.pl or z.nahorski@wit.edu.pl (Z.N.)

<sup>2</sup> Warsaw School of Information Technology (WIT), 01-447 Warsaw, Poland;

\* Correspondence: holnicki@ibspan.waw.pl

Supplementary material <https://dieselnet.com/standards/eu>

**Table S1.** Euro Norms for the gasoline cars.

| emission                      | EURO 1<br>[1993] | EURO 2<br>[1997] | EURO 3<br>[2001] | EURO 4<br>[2006] | EURO 5<br>[2011] | EURO 6<br>[2015]       |
|-------------------------------|------------------|------------------|------------------|------------------|------------------|------------------------|
| <a href="#">CO</a> [g/km]     | 2.72             | 2.2              | 2.3              | 1                | 1                | 1                      |
| <a href="#">HC</a> [g/km]     | –                | –                | 0.2              | 0.1              | 0.1              | 0.1                    |
| <a href="#">NOx</a> [g/km]    | –                | –                | 0.15             | 0.08             | 0.06             | 0.06                   |
| <a href="#">HC+NOx</a> [g/km] | 0.97             | 0.5              | –                | –                | –                | –                      |
| <a href="#">PM</a> [g/km]     | –                | –                | –                | –                | 0.005*           | 0.005*                 |
| <a href="#">PN</a> [1/km]     | –                | –                | –                | –                | –                | 6.0×10 <sup>11**</sup> |

\* vehicles using DI engines; 0.0045 g/km using the PMP measurement procedure

\*\* vehicles using DI engines; 6.0×10<sup>12</sup> 1/km in first 3 years from Euro 6 effective dates

**Table S2.** Euro Norms for the diesel cars .

| emission                      | EURO 1<br>[1992] | EURO 2<br>[1996] | EURO 3<br>[2001] | EURO 4<br>[2006] | EURO 5<br>[2011]       | EURO 6<br>[2014]       |
|-------------------------------|------------------|------------------|------------------|------------------|------------------------|------------------------|
| <a href="#">CO</a> [g/km]     | 2.72             | 1                | 0.64             | 0.5              | 0.5                    | 0.5                    |
| <a href="#">HC</a> [g/km]     | –                | –                | –                | –                | –                      | –                      |
| <a href="#">NOx</a> [g/km]    | –                | –                | 0.5              | 0.25             | 0.18                   | 0.08                   |
| <a href="#">HC+NOx</a> [g/km] | 0.97             | 0.7              | 0.56             | 0.3              | 0.23                   | 0.17                   |
| <a href="#">PM</a> [g/km]     | 0.14             | 0.08             | 0.05             | 0.025            | 0.005*                 | 0.005*                 |
| <a href="#">PN</a> [1/km]     | –                | –                | –                | –                | 6.0×10 <sup>11**</sup> | 6.0×10 <sup>11**</sup> |

\* 0.0045 g/km using the PMP measurement procedure

\*\* vehicles using DI engines; 6.0×10<sup>12</sup> 1/km in first 3 years from Euro 6 effective dates

**Table S3. Euro Norms for HDV diesel cars.**

| emission                       | EURO 1<br>[1992] | EURO 2<br>[1998] | EURO 3<br>[2000] | EURO 4<br>[2005] | EURO 5<br>[2008] | EURO 6<br>[2013]     |
|--------------------------------|------------------|------------------|------------------|------------------|------------------|----------------------|
| <a href="#">CO</a> [g/kWh]     | 4.5              | 4.0              | 2.1              | 1.5              | 1.5              | 1.5                  |
| <a href="#">HC</a> [g/kWh]     | 1.1              | 1.1              | 0.66             | 0.46             | 0.46             | 0.13                 |
| <a href="#">NOx</a> [g/kWh]    | 8.0              | 7.0              | 5.0              | 3.5              | 2.0              | 0.4                  |
| <a href="#">HC+NOx</a> [g/kWh] | –                | –                | –                | –                | –                | –                    |
| <a href="#">PM</a> [g/kWh]     | 0.612            | 0.25             | 0.10             | 0.02             | 0.02             | 0.01                 |
| <a href="#">PN</a> [1/kWh]     | –                | –                | –                | –                | –                | 8.0×10 <sup>11</sup> |

**Table S4. Limit emission norms for low-emission boilers.**

Limit emission values due to **PN-EN 303-5:2012**

| Fuel feeding | Fuel type | Nominal thermal power<br>kW | Emission limit values<br>(mg/m <sup>3</sup> at 10 % O <sub>2</sub> ) |         |         |           |         |         |         |         |         |
|--------------|-----------|-----------------------------|----------------------------------------------------------------------|---------|---------|-----------|---------|---------|---------|---------|---------|
|              |           |                             | CO                                                                   |         |         | OGC (LZO) |         |         | PM      |         |         |
|              |           |                             | Klasa 3                                                              | Klasa 4 | Klasa 5 | Klasa 3   | Klasa 4 | Klasa 5 | Klasa 3 | Klasa 4 | Klasa 5 |
| Manual       | Biogenic  | ≤ 50                        | 5000                                                                 |         |         | 150       |         |         | 150     |         |         |
|              |           | > 50 ≤ 150                  | 2500                                                                 |         |         | 100       |         |         | 150     |         |         |
|              |           | > 150 ≤ 500                 | 1200                                                                 | 1200    | 700     | 100       | 50      | 30      | 150     | 75      | 60      |
|              | Fossil    | ≤ 50                        | 5000                                                                 |         |         | 150       |         |         | 125     |         |         |
|              |           | > 50 ≤ 150                  | 2500                                                                 |         |         | 100       |         |         | 125     |         |         |
|              |           | > 150 ≤ 500                 | 1200                                                                 |         |         | 100       |         |         | 125     |         |         |
| Automatic    | Biogenic  | ≤ 50                        | 3000                                                                 |         |         | 100       |         |         | 150     |         |         |
|              |           | > 50 ≤ 150                  | 2500                                                                 |         |         | 80        |         |         | 150     |         |         |
|              |           | > 150 ≤ 500                 | 1200                                                                 | 1000    | 500     | 80        | 30      | 20      | 150     | 60      | 40      |
|              | Fossil    | ≤ 50                        | 3000                                                                 |         |         | 100       |         |         | 125     |         |         |
|              |           | > 50 ≤ 150                  | 2500                                                                 |         |         | 80        |         |         | 125     |         |         |
|              |           | > 150 ≤ 500                 | 1200                                                                 |         |         | 80        |         |         | 125     |         |         |

Limit emission values due to "Ecodesign" Directive

| Fuel feeding | Fuel type | Nominal thermal power<br>kW | Emission limit values<br>(seasonal emission) (mg/m <sup>3</sup> at 10 % O <sub>2</sub> ) |           |    |                 |
|--------------|-----------|-----------------------------|------------------------------------------------------------------------------------------|-----------|----|-----------------|
|              |           |                             | CO                                                                                       | OGC (LZO) | PM | NO <sub>x</sub> |
| Manual       | Biogenic  | ≤ 500                       | 700                                                                                      | 30        | 60 | 200             |
|              | Fossil    |                             |                                                                                          |           |    | 350             |
| Automatic    | Biogenic  | ≤ 500                       | 500                                                                                      | 20        | 40 | 200             |
|              | Fossil    |                             |                                                                                          |           |    | 350             |

## Warszawa - Okęcie (106m)

diagram

Planista Podróży (Zalanyj Podróż)

Robot Klimatu

Analiza (miesiąc)

Analiza (rok)

|                                    |        |
|------------------------------------|--------|
| start                              | koniec |
| styczeń ▾                          | 2018 ▾ |
| grudzień ▾                         | 2018 ▾ |
| <input type="button" value="idź"/> |        |

Wind-direction (styczeń 2018 - grudzień 2018)

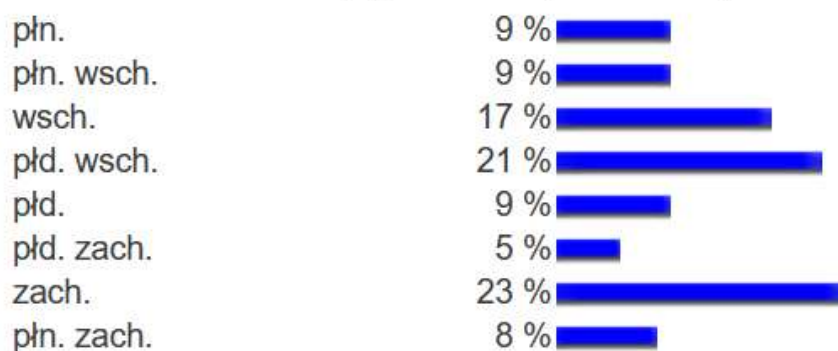

Figure S1. Wind Rose for Warsaw 2018

<https://www.weatheronline.pl/weather/maps>
